# Supplementary material
Source: Springer Nature journal article supplement (https://www.springermedizin.de/resource/supplementary/12913_2013_2829_MOESM4_ESM.pdf/9531634)
Supplement: MOESM4 [file 9531634]

### **Initial Study Cohort**

Adults ( $\geq 18$  years) with incident diabetes (January 1, 2004 - March 31, 2010) with at least one hospitalization following their diabetes diagnosis date (until March 31, 2011)

**(n=39203)**

### **Exclude:**

- Pregnancy-related hospitalizations (**n=3485**)
- Individuals with ESRD on or before index hospitalization (**n=332**)
- Individuals that died during their index hospitalization (**n=1575**)

### **Final Study Cohort**

Adults with incident diabetes (January 1, 2004 - March 31, 2010) with at least one hospitalization following their diabetes diagnosis date (until March 31, 2011)

**(n=33811)**
